# Supplementary material for: Transcriptome Analysis Revealed the Mechanism by Which Exogenous ABA Increases Anthocyanins in Blueberry Fruit During Veraison
Source: Front Plant Sci. 2021 Nov 11;12:758215. doi: 10.3389/fpls.2021.758215 (PMC8632357; doi:10.3389/fpls.2021.758215)
Supplement: Supplementary Table 1 — Mean fresh fruit length, diameter and weight throughout ripening. Data are means ± SE (n = 10). Different letters indicates statistical significance (P < 0.05) as determined by a one-way ANOVA test (Duncan’s multiple range). [file Table_1.XLSX]

## Sheet: Sheet1
Stage	Length(cm)	Diameter(cm)	Weight(g)
S1	10.93±0.51 c	9.41±0.49 c	0.67±0.09 c
S2	11.37±0.43 c	9.45±0.56 c	0.68±0.08 c
S3	11.4±0.44 c	9.54±0.34 c	0.73±0.07 c
S4	13.16±0.46 b	10.99±0.38 b	1.13±0.10 b
S5	13.55±0.28 b	11.46±0.39 b	1.33±0.06 b
S6	15.19±0.68 a	12.53±0.47 a	1.87±0.19 a
