# Supplementary material for: Transcriptome Analysis Revealed the Mechanism by Which Exogenous ABA Increases Anthocyanins in Blueberry Fruit During Veraison
Source: Front Plant Sci. 2021 Nov 11;12:758215. doi: 10.3389/fpls.2021.758215 (PMC8632357; doi:10.3389/fpls.2021.758215)
Supplement: Supplementary Table 2 — The overall statistical analysis of bases and reads of each samples. [file Table_2.XLSX]

## Sheet: Sheet1
mple_name	Raw_reads	Clean_reads	Raw_bases(G)	Clean_bases(G)	Error rate(%)	Q20(%)	Q30(%)	GC_content(%)
A01	56060546	54933636	8.41	8.24	0.03	97.46	92.86	46.56
A02	53819508	52880010	8.07	7.93	0.03	97.5	92.99	46.19
A03	65329770	64004282	9.8	9.6	0.03	97.48	92.93	45.49
A121	68369218	67486370	10.26	10.12	0.03	97.49	93	46.67
A122	62648968	61598408	9.4	9.24	0.03	97.52	93.07	46.5
A123	58620986	57820604	8.79	8.67	0.03	97.3	92.6	46.62
A151	60598982	59659840	9.09	8.95	0.03	96.61	91.09	46.56
A152	62135214	61308716	9.32	9.2	0.03	97.46	92.94	46.44
A153	57091586	56139488	8.56	8.42	0.03	97.38	92.75	46.35
A31	65092484	63888298	9.76	9.58	0.03	97.51	93	45.95
A32	64318952	63160680	9.65	9.47	0.03	97.56	93.14	46.25
A33	72753716	71506240	10.91	10.73	0.03	97.44	92.84	45.96
A61	71839102	69766498	10.78	10.46	0.03	97.56	93.12	45.84
A62	58880864	58033534	8.83	8.71	0.03	97.46	92.89	46.22
A63	57569166	56650206	8.64	8.5	0.03	97.5	92.92	45.73
A91	58543562	57459920	8.78	8.62	0.03	97.37	92.76	46.46
A92	62658734	61598418	9.4	9.24	0.03	97.5	93.01	46.29
A93	53295636	52387898	7.99	7.86	0.03	97.53	93.11	46.38
C01	62698450	61540912	9.4	9.23	0.03	97.43	92.79	45.78
C02	61218278	60153586	9.18	9.02	0.03	97.5	93	45.89
C03	56736496	55956554	8.51	8.39	0.03	97.62	93.24	46.35
C121	62774054	61364114	9.42	9.2	0.03	97.22	92.43	46.46
C122	63310244	62122982	9.5	9.32	0.03	97.15	92.26	46.52
C123	56943588	55494776	8.54	8.32	0.03	97.29	92.56	46.46
C151	57007848	55705786	8.55	8.36	0.03	97.19	92.37	46.32
C152	66500144	64977650	9.98	9.75	0.03	97.47	92.94	46.34
C153	74370760	72604228	11.16	10.89	0.03	97.43	92.87	46.26
C31	66121904	65070504	9.92	9.76	0.03	97.55	93.1	45.96
C32	46957800	46098872	7.04	6.91	0.03	97.58	93.12	45.83
C33	55215480	54242380	8.28	8.14	0.03	97.39	92.76	46.04
C61	72186756	70904148	10.83	10.64	0.03	97.43	92.81	46.08
C62	63093306	61878402	9.46	9.28	0.03	97.44	92.88	46
C63	57725030	56619610	8.66	8.49	0.03	97.42	92.81	46.23
C91	67956424	66745818	10.19	10.01	0.02	98.14	94.58	46.59
C92	61988628	60008458	9.3	9	0.03	97.49	93.02	46.32
C93	56121680	55151284	8.42	8.27	0.03	97.43	92.87	46.53
