# Supplementary material for: Transcriptome Analysis Revealed the Mechanism by Which Exogenous ABA Increases Anthocyanins in Blueberry Fruit During Veraison
Source: Front Plant Sci. 2021 Nov 11;12:758215. doi: 10.3389/fpls.2021.758215 (PMC8632357; doi:10.3389/fpls.2021.758215)
Supplement: Supplementary Table 3 — The overall statistical analysis of reads mapping of each samples. [file Table_3.XLSX]

## Sheet: Sheet1
Sample name	A01	A02	A03	A121	A122	A123	A151	A152	A153	A31	A32	A33	A61	A62	A63	A91	A92	A93	C01	C02	C03	C121	C122	C123	C151	C152	C153	C31	C32	C33	C61	C62	C63	C91	C92	C93
Total reads	54933636	52880010	64004282	67486370	61598408	57820604	59659840	61308716	56139488	63888298	63160680	71506240	69766498	58033534	56650206	57459920	61598418	52387898	61540912	60153586	55956554	61364114	62122982	55494776	55705786	64977650	72604228	65070504	46098872	54242380	70904148	61878402	56619610	66745818	60008458	55151284
Total mapped	48996276 (89.19%)	46926533 (88.74%)	56842784 (88.81%)	59435653 (88.07%)	54116111 (87.85%)	50661278 (87.62%)	51892364 (86.98%)	53794860 (87.74%)	49063595 (87.4%)	56659030 (88.68%)	55809187 (88.36%)	63305303 (88.53%)	61539900 (88.21%)	51517925 (88.77%)	50130355 (88.49%)	50082756 (87.16%)	54267730 (88.1%)	45879064 (87.58%)	54520827 (88.59%)	53133253 (88.33%)	50004704 (89.36%)	53447329 (87.1%)	54521123 (87.76%)	48782854 (87.91%)	48753866 (87.52%)	57139344 (87.94%)	63710880 (87.75%)	57425166 (88.25%)	40883338 (88.69%)	47972207 (88.44%)	62931897 (88.76%)	54134791 (87.49%)	49774796 (87.91%)	58852447 (88.17%)	52128523 (86.87%)	48221286 (87.43%)
Multiple mapped	18305226 (33.32%)	17349991 (32.81%)	22944981 (35.85%)	20306710 (30.09%)	18833848 (30.58%)	17275175 (29.88%)	17799444 (29.83%)	18670551 (30.45%)	17106036 (30.47%)	20865090 (32.66%)	19949643 (31.59%)	23296488 (32.58%)	23010371 (32.98%)	19134494 (32.97%)	18572895 (32.79%)	17312404 (30.13%)	19355028 (31.42%)	15974393 (30.49%)	21602619 (35.1%)	20136132 (33.47%)	19077931 (34.09%)	18611383 (30.33%)	18959595 (30.52%)	17119406 (30.85%)	17179406 (30.84%)	20224793 (31.13%)	22734177 (31.31%)	21121002 (32.46%)	15541559 (33.71%)	18622240 (34.33%)	23222917 (32.75%)	19464751 (31.46%)	18219272 (32.18%)	20652607 (30.94%)	17477753 (29.13%)	16660555 (30.21%)
Uniquely mapped	30691050 (55.87%)	29576542 (55.93%)	33897803 (52.96%)	39128943 (57.98%)	35282263 (57.28%)	33386103 (57.74%)	34092920 (57.15%)	35124309 (57.29%)	31957559 (56.93%)	35793940 (56.03%)	35859544 (56.78%)	40008815 (55.95%)	38529529 (55.23%)	32383431 (55.8%)	31557460 (55.71%)	32770352 (57.03%)	34912702 (56.68%)	29904671 (57.08%)	32918208 (53.49%)	32997121 (54.85%)	30926773 (55.27%)	34835946 (56.77%)	35561528 (57.24%)	31663448 (57.06%)	31574460 (56.68%)	36914551 (56.81%)	40976703 (56.44%)	36304164 (55.79%)	25341779 (54.97%)	29349967 (54.11%)	39708980 (56%)	34670040 (56.03%)	31555524 (55.73%)	38199840 (57.23%)	34650770 (57.74%)	31560731 (57.23%)
Read-1	15401541 (28.04%)	14824251 (28.03%)	17007422 (26.57%)	19617282 (29.07%)	17671620 (28.69%)	16759193 (28.98%)	17230753 (28.88%)	17604717 (28.71%)	16032318 (28.56%)	17944425 (28.09%)	17972974 (28.46%)	20078049 (28.08%)	19312792 (27.68%)	16241593 (27.99%)	15840331 (27.96%)	16438705 (28.61%)	17500075 (28.41%)	14980644 (28.6%)	16515956 (26.84%)	16549738 (27.51%)	15502739 (27.7%)	17504801 (28.53%)	17884547 (28.79%)	15906525 (28.66%)	15866277 (28.48%)	18502055 (28.47%)	20550127 (28.3%)	18177692 (27.94%)	12710282 (27.57%)	14735775 (27.17%)	19922438 (28.1%)	17393633 (28.11%)	15829794 (27.96%)	19095875 (28.61%)	17372122 (28.95%)	15828855 (28.7%)
Read-2	15289509 (27.83%)	14752291 (27.9%)	16890381 (26.39%)	19511661 (28.91%)	17610643 (28.59%)	16626910 (28.76%)	16862167 (28.26%)	17519592 (28.58%)	15925241 (28.37%)	17849515 (27.94%)	17886570 (28.32%)	19930766 (27.87%)	19216737 (27.54%)	16141838 (27.81%)	15717129 (27.74%)	16331647 (28.42%)	17412627 (28.27%)	14924027 (28.49%)	16402252 (26.65%)	16447383 (27.34%)	15424034 (27.56%)	17331145 (28.24%)	17676981 (28.45%)	15756923 (28.39%)	15708183 (28.2%)	18412496 (28.34%)	20426576 (28.13%)	18126472 (27.86%)	12631497 (27.4%)	14614192 (26.94%)	19786542 (27.91%)	17276407 (27.92%)	15725730 (27.77%)	19103965 (28.62%)	17278648 (28.79%)	15731876 (28.52%)
Reads map to '+'	15291718 (27.84%)	14752075 (27.9%)	16907725 (26.42%)	19555629 (28.98%)	17624650 (28.61%)	16677947 (28.84%)	17023964 (28.54%)	17558980 (28.64%)	15970412 (28.45%)	17859276 (27.95%)	17888998 (28.32%)	19958159 (27.91%)	19211659 (27.54%)	16146529 (27.82%)	15742773 (27.79%)	16362524 (28.48%)	17426571 (28.29%)	14930848 (28.5%)	16399495 (26.65%)	16452364 (27.35%)	15421012 (27.56%)	17386806 (28.33%)	17757832 (28.58%)	15803532 (28.48%)	15762002 (28.3%)	18431840 (28.37%)	20466673 (28.19%)	18104610 (27.82%)	12637111 (27.41%)	14632494 (26.98%)	19808015 (27.94%)	17295693 (27.95%)	15743455 (27.81%)	19092813 (28.61%)	17301407 (28.83%)	15759050 (28.57%)
Reads map to '-'	15399332 (28.03%)	14824467 (28.03%)	16990078 (26.55%)	19573314 (29%)	17657613 (28.67%)	16708156 (28.9%)	17068956 (28.61%)	17565329 (28.65%)	15987147 (28.48%)	17934664 (28.07%)	17970546 (28.45%)	20050656 (28.04%)	19317870 (27.69%)	16236902 (27.98%)	15814687 (27.92%)	16407828 (28.56%)	17486131 (28.39%)	14973823 (28.58%)	16518713 (26.84%)	16544757 (27.5%)	15505761 (27.71%)	17449140 (28.44%)	17803696 (28.66%)	15859916 (28.58%)	15812458 (28.39%)	18482711 (28.44%)	20510030 (28.25%)	18199554 (27.97%)	12704668 (27.56%)	14717473 (27.13%)	19900965 (28.07%)	17374347 (28.08%)	15812069 (27.93%)	19107027 (28.63%)	17349363 (28.91%)	15801681 (28.65%)
Non-splice reads	18212347 (33.15%)	17226102 (32.58%)	19612778 (30.64%)	23053344 (34.16%)	21172438 (34.37%)	19707042 (34.08%)	20277578 (33.99%)	20969975 (34.2%)	19081570 (33.99%)	20967352 (32.82%)	21124398 (33.45%)	23196369 (32.44%)	22720156 (32.57%)	19028790 (32.79%)	18420129 (32.52%)	19568860 (34.06%)	21107134 (34.27%)	17816487 (34.01%)	18960690 (30.81%)	18927952 (31.47%)	18107634 (32.36%)	20705696 (33.74%)	20940924 (33.71%)	19003469 (34.24%)	18919041 (33.96%)	22096919 (34.01%)	24680336 (33.99%)	20838606 (32.02%)	14597372 (31.67%)	17004122 (31.35%)	23189079 (32.7%)	19977328 (32.28%)	18551796 (32.77%)	22981328 (34.43%)	21450497 (35.75%)	19026250 (34.5%)
Splice reads	12478703 (22.72%)	12350440 (23.36%)	14285025 (22.32%)	16075599 (23.82%)	14109825 (22.91%)	13679061 (23.66%)	13815342 (23.16%)	14154334 (23.09%)	12875989 (22.94%)	14826588 (23.21%)	14735146 (23.33%)	16812446 (23.51%)	15809373 (22.66%)	13354641 (23.01%)	13137331 (23.19%)	13201492 (22.98%)	13805568 (22.41%)	12088184 (23.07%)	13957518 (22.68%)	14069169 (23.39%)	12819139 (22.91%)	14130250 (23.03%)	14620604 (23.53%)	12659979 (22.81%)	12655419 (22.72%)	14817632 (22.8%)	16296367 (22.45%)	15465558 (23.77%)	10744407 (23.31%)	12345845 (22.76%)	16519901 (23.3%)	14692712 (23.74%)	13003728 (22.97%)	15218512 (22.8%)	13200273 (22%)	12534481 (22.73%)
Reads mapped in proper pairs	27192320 (49.5%)	26232660 (49.61%)	30165066 (47.13%)	34525066 (51.16%)	31214402 (50.67%)	29449378 (50.93%)	29817860 (49.98%)	30944576 (50.47%)	28160354 (50.16%)	31860734 (49.87%)	31732930 (50.24%)	35530030 (49.69%)	34389986 (49.29%)	28782692 (49.6%)	28087884 (49.58%)	28785178 (50.1%)	30891202 (50.15%)	26384570 (50.36%)	29236964 (47.51%)	29392238 (48.86%)	27491022 (49.13%)	30708862 (50.04%)	31369596 (50.5%)	27961666 (50.39%)	27933110 (50.14%)	32722750 (50.36%)	36293082 (49.99%)	32246570 (49.56%)	22532278 (48.88%)	26061680 (48.05%)	35357060 (49.87%)	30722230 (49.65%)	27917180 (49.31%)	33824440 (50.68%)	30493638 (50.82%)	27820668 (50.44%)
Proper-paired reads map to different chrom	0 (0%)	0 (0%)	0 (0%)	0 (0%)	0 (0%)	0 (0%)	0 (0%)	0 (0%)	0 (0%)	0 (0%)	0 (0%)	0 (0%)	0 (0%)	0 (0%)	0 (0%)	0 (0%)	0 (0%)	0 (0%)	0 (0%)	0 (0%)	0 (0%)	0 (0%)	0 (0%)	0 (0%)	0 (0%)	0 (0%)	0 (0%)	0 (0%)	0 (0%)	0 (0%)	0 (0%)	0 (0%)	0 (0%)	0 (0%)	0 (0%)	0 (0%
