# Supplementary material for: Transcriptome Analysis Revealed the Mechanism by Which Exogenous ABA Increases Anthocyanins in Blueberry Fruit During Veraison
Source: Front Plant Sci. 2021 Nov 11;12:758215. doi: 10.3389/fpls.2021.758215 (PMC8632357; doi:10.3389/fpls.2021.758215)
Supplement: Supplementary Table 4 — Primers used in qRT-PCR. [file Table_4.XLSX]

## Sheet: Sheet1
GeneID	Sence	AntiSense	Annealing temperature（℃）
VaccDscaff13-snap-gene-106.35-up	GTGAGAAAGGGTGCTTGGAC	GCCTTGTAGGGAACTTGGTG	63.7
VaccDscaff13-snap-gene-106.36-	GGATAACGGTGAAGAAGCAA	AAGGTCCACATTGTCCATAAAA	61
VaccDscaff20-snap-gene-232.35	TATCATTCTGCTACAGCCTAC	GATGTCTGGACGAAGATAGTT	60.1
VaccDscaff1486-snap-gene-0.3	GGATAACGGTGAAGAAGCAA	AAGGTCCACATTGTCCATAAAA	61.3
VaccDscaff42-augustus-gene-203.27	CATAGTTCCGCTACAAATCA	CACAAGGCACCTTAACAAAT	58.4
VaccDscaff44-augustus-gene-196.26	AGACACGAATAAAGGAGCAT	AATCCATCTTAGCCTACAAC	57.9
VaccDscaff28-augustus-gene-197.19	AGACACGAATAAAGGAGCAT	AATCCATCTTAGCCTACAAC	57.9
VaccDscaff19-augustus-gene-5.35	CGACAATAACTCCTCCATCC	TCCTGACCTCTACCTCGTTC	60.6
VaccDscaff20-augustus-gene-6.38	TCGGCTGATGGATCTGTGAG	ATCGGAGTAAAGGAGTGTCTGG	64.3
VaccDscaff28-augustus-gene-346.33	GAGGGTAGTTTACCTTTCAGTT	ATTATTCGCTCAGGAGTAGG	59.5
VaccDscaff48-augustus-gene-105.36	CCTACCCACTCTACGCCACT	CGCGGTTGTTGTATTCTTCA	61.7

## Sheet: Sheet2
表 4-1 蓝莓转录组qRT-PCR验证引物
Table 4-1 blueberry transcriptome qRT-PCR validation primers
引物名称	引物序列（5'-3'）	退火温度（℃）
Primer Names	Primer Sequence(5'-3')	Tm (℃)
VaccDscaff13-snap-gene-106.35-up	GTGAGAAAGGGTGCTTGGAC	63.7
VaccDscaff13-snap-gene-106.35-down	GCCTTGTAGGGAACTTGGTG	63.7
VaccDscaff13-snap-gene-106.36-up	GGATAACGGTGAAGAAGCAA	61
VaccDscaff13-snap-gene-106.36-down	AAGGTCCACATTGTCCATAAAA	61
VaccDscaff20-snap-gene-232.35-up	TATCATTCTGCTACAGCCTAC	60.1
VaccDscaff20-snap-gene-232.35-down	GATGTCTGGACGAAGATAGTT	60.1
VaccDscaff1486-snap-gene-0.3-up	GGATAACGGTGAAGAAGCAA	61.3
VaccDscaff1486-snap-gene-0.3-down	AAGGTCCACATTGTCCATAAAA	61.3
VaccDscaff42-augustus-gene-203.27-up	CATAGTTCCGCTACAAATCA	58.4
VaccDscaff42-augustus-gene-203.27-down	CACAAGGCACCTTAACAAAT	58.4
VaccDscaff44-augustus-gene-196.26-up	AGACACGAATAAAGGAGCAT	57.9
VaccDscaff44-augustus-gene-196.26-down	AATCCATCTTAGCCTACAAC	57.9
VaccDscaff28-augustus-gene-197.19-up	AGACACGAATAAAGGAGCAT	57.9
VaccDscaff28-augustus-gene-197.19-down	AATCCATCTTAGCCTACAAC	57.9
VaccDscaff19-augustus-gene-5.35-up	CGACAATAACTCCTCCATCC	60.6
VaccDscaff19-augustus-gene-5.35-down	TCCTGACCTCTACCTCGTTC	60.6
VaccDscaff20-augustus-gene-6.38-up	TCGGCTGATGGATCTGTGAG	64.3
VaccDscaff20-augustus-gene-6.38-down	ATCGGAGTAAAGGAGTGTCTGG	64.3
VaccDscaff28-augustus-gene-346.33-up	GAGGGTAGTTTACCTTTCAGTT	59.5
VaccDscaff28-augustus-gene-346.33-down	ATTATTCGCTCAGGAGTAGG	59.5
VaccDscaff48-augustus-gene-105.36-up	CCTACCCACTCTACGCCACT	61.7
VaccDscaff48-augustus-gene-105.36-down	CGCGGTTGTTGTATTCTTCA	61.7
