# Supplementary material for: Transcriptome Analysis Revealed the Mechanism by Which Exogenous ABA Increases Anthocyanins in Blueberry Fruit During Veraison
Source: Front Plant Sci. 2021 Nov 11;12:758215. doi: 10.3389/fpls.2021.758215 (PMC8632357; doi:10.3389/fpls.2021.758215)
Supplement: Supplementary Table 5 — Four copies of VcMYBA promoter region elements were predicted. The prediction is made by online database PLACE. [file Table_5.XLSX]

## Sheet: Sheet1
GeneID		VcMYBA1-2	VcMYBAlike1-1	VcMYBlike2-1	VcMYBlike2-1
Elenment	Function	Elenment numeber
ABRE	ABA responsiveness	2	4	4	4
CGTCA-motif	MeJA responsiveness	1	0	0	0
TGACG-motif	MeJA-responsiveness	1	0	0	0
ARE	Anaerobic induction	3	0	0	0
AE-box	Light responsiveness	1	1	1	1
G-Box	Light responsiveness	1	2	2	2
GATA-motif	Light responsiveness	1	0	0	0
GT1-motif	Light responsiveness	2	1	1	1
3-AF1 binding site	Light responsiveness	1	1	1	1
I-box	Light responsiveness	1	0	0	0
Box 4	Light responsiveness	0	4	4	4
SP1	Light responsiveness	0	1	1	1
LTR	Low-temperature responsiveness	1	0	0	0
MBS	Drought-inducibility	3	0	0	0
TC-rich repeats	Defense and stress responsiveness	0	1	1	1
WUN-motif	Wound-responsive element	0	1	1	1
CAT-box	Meristem expression	0	0	1	1
MYB		6	4	4	4
MYC		7	4	4	4
