# Supplementary material for: Transcriptome Analysis Revealed the Mechanism by Which Exogenous ABA Increases Anthocyanins in Blueberry Fruit During Veraison
Source: Front Plant Sci. 2021 Nov 11;12:758215. doi: 10.3389/fpls.2021.758215 (PMC8632357; doi:10.3389/fpls.2021.758215)
Supplement: Supplementary Table 6 — Primers for VIGS, including enzyme digestion sites. [file Table_6.XLSX]

## Sheet: Sheet1
Name	Sense	Anti-sense
vigsexon	CGGGATCCATTGCGGGTAGGCTTCCAGG	GGGGTACCGTCCACGTCATCATACCTCTGC
vigsintron	CGGGATCCTCGTGTTAAATGCGTGGTAG	GGGGTACCTGTCAGGATTTGATTATGGC
BamHI-up	CGGGATCC
KPNI-down	GGGGTACC
